# Supplementary material for: From a distance: Shuttleworth revisited
Source: Royal Society of Chemistry journal article supplement (doi:10.1039/d4sm00078a), 2024-01-01
Supplement: d4sm00078a1.pdf [file d4sm00078a1.pdf]

Cite this: DOI: 00.0000/xxxxxxxxxx

## Supplementary Material From a distance: Shuttleworth revisited

Stefanie Heyden<sup>\*a</sup> and Nicolas Bain<sup>\*b</sup>

Received Date  
Accepted Date

DOI: 00.0000/xxxxxxxxxx

### 1 Surface Projection

To project fields defined over the domain  $\Omega_0$  onto the surface  $S_0$ , we introduce the surface projection tensor for a tangent surface with outward unit normal  $\mathbf{N}$  as

$$\mathbb{P} = \mathbf{I} - \mathbf{N} \otimes \mathbf{N}, \quad (\text{S.1})$$

where  $\mathbf{I}$  is the second-order identity tensor<sup>1</sup>. A smooth vector field  $\mathbf{v}$  (e.g. a displacement field) and a smooth second-order tensor field  $\mathbf{T}$  (e.g. a stress field) are projected onto the surface as

$$\mathbf{v}_s = \mathbb{P}\mathbf{v} \quad \text{and} \quad \mathbf{T}_s = \mathbb{P}\mathbf{T}\mathbb{P}. \quad (\text{S.2})$$

Furthermore, the surface gradient of a vector field follows from

$$\nabla_s \phi = \mathbb{P} \nabla \phi \quad \text{and} \quad \nabla_s \mathbf{v} = (\nabla \mathbf{v}) \mathbb{P}. \quad (\text{S.3})$$

As an example, the surface deformation gradient follows as

$$\mathbf{F}_s = \mathbf{I} + \mathbb{P} \nabla_s \mathbf{u}. \quad (\text{S.4})$$

Note that within the manuscript, the projection tensor is dropped for simplicity as in previous studies<sup>1</sup>.

### 2 Finite Kinematics

#### 2.1 General setting

The non-linear Shuttleworth equations correspond to the expressions of the stress measures as a function of the surface energy in the current configuration  $W^c$ . In this setting, the second Piola-Kirchhoff stress follows as

$$\mathbf{S}_s = W^c \frac{\partial J_s}{\partial \mathbf{E}_s} + J_s \frac{\partial W^c}{\partial \mathbf{E}_s}. \quad (\text{S.5})$$

Noting that  $J_s = \det(\mathbf{F}_s) = \sqrt{\det(2\mathbf{E}_s + \mathbf{I})}$ , and using the relationship

$$\frac{\partial \det \mathbf{M}}{\partial \mathbf{M}} = (\det \mathbf{M}) \mathbf{M}^{-T} \quad (\text{S.6})$$

for any invertible tensor  $\mathbf{M}$ , we obtain the non-linear Shuttleworth equation for the second Piola-Kirchhoff stress tensor

$$\mathbf{S}_s = W^c J_s \left( \mathbf{F}_s^T \mathbf{F}_s \right)^{-1} + J_s \frac{\partial W^c}{\partial \mathbf{E}_s}. \quad (\text{S.7})$$

Equivalently, the first Piola-Kirchhoff stress tensor reads

$$\mathbf{P}_s = W^c J_s \mathbf{F}_s \left( \mathbf{F}_s^T \mathbf{F}_s \right)^{-1} + J_s \mathbf{F}_s \frac{\partial W^c}{\partial \mathbf{E}_s}, \quad (\text{S.8})$$

and the Cauchy stress is given as

$$\boldsymbol{\sigma}_s = W^c \mathbf{I} + \mathbf{F}_s \frac{\partial W^c}{\partial \mathbf{E}_s} \mathbf{F}_s^T. \quad (\text{S.9})$$

#### 2.2 Surface stress-strain relations

We can tailor stress measures to a specific constitutive material model by choosing, e.g., the St. Venant-Kirchhoff model

$$W^R(\mathbf{E}_s) = \gamma J_s + \mu_s \text{tr}(\mathbf{E}_s \mathbf{E}_s) + \frac{1}{2} \lambda_s (\text{tr}(\mathbf{E}_s))^2. \quad (\text{S.10})$$

In addition to relation (S.6), we note that the derivative of a tensor  $\mathbf{M}$  with respect to that tensor is simply  $\frac{\partial \text{tr}(\mathbf{M})}{\partial \mathbf{M}} = \mathbf{I}$ . Using the chain rule, the different stress measures under consideration then follow as

$$\begin{aligned} \mathbf{S}_s &= \frac{\partial W^R}{\partial \mathbf{E}_s} = \mathbf{F}^{-1} \frac{\partial W^R}{\partial \mathbf{F}_s} \\ &= \gamma J_s (\mathbf{F}_s^T \mathbf{F}_s)^{-1} + 2\mu_s \mathbf{E}_s + \lambda_s \text{tr}(\mathbf{E}_s) \mathbf{I}, \end{aligned} \quad (\text{S.11})$$

and the relations

$$\mathbf{P}_s = \mathbf{F}_s \mathbf{S}_s \quad \text{and} \quad \boldsymbol{\sigma}_s = J_s^{-1} \mathbf{P}_s \mathbf{F}_s^T \quad (\text{S.12})$$

lead to the main text equations (7) and (8).

<sup>a</sup> ETH Zürich, Institute for Building Materials, 8093 Zürich, Switzerland. E-mail: stefanie.heyden@mat.ethz.ch

<sup>b</sup> Université Claude Bernard Lyon 1, CNRS, Institut Lumière Matière, UMR5306, F-69100, Villeurbanne, France. E-mail: nicolas.bain@cnrs.fr

\* These two authors contributed equally.

### 3 Linearization

For linearized surface relaxation, we express all quantities at play,  $J$ ,  $\mathbf{F}$  and  $\mathbf{E}$  at first order in displacement gradient  $\nabla \mathbf{u}$  or in strains  $\boldsymbol{\epsilon}$ . The deformation gradient is readily defined at first order,  $\mathbf{F} = \mathbf{I} + \nabla \mathbf{u}$ , the Green-Lagrange strain tensor at first order simplifies to the linear strains  $\mathbf{E} = \boldsymbol{\epsilon} + \mathcal{O}(\boldsymbol{\epsilon}^2)$ , and the local area change simplifies to  $J = [1 + \text{tr}(\boldsymbol{\epsilon})] + \mathcal{O}(\boldsymbol{\epsilon}^2)$ .

For finite surface relaxation, we expand all terms to linear order in  $\nabla \mathbf{u}^0$ , whereas terms involving  $\mathbf{F}^*$  stay finite. The deformation gradient then simplifies to  $\mathbf{F} = (\mathbf{I} + \nabla \mathbf{u}^0) \mathbf{F}^* + \mathcal{O}([\nabla \mathbf{u}^0]^2)$ , the Green-Lagrange tensor to  $\mathbf{E} = \mathbf{E}^* + \mathbf{F}^* \boldsymbol{\epsilon}^0 (\mathbf{F}^*)^T + \mathcal{O}([\nabla \mathbf{u}^0]^2)$ , and the local area change to  $J = [1 + \text{tr}(\boldsymbol{\epsilon}^0)] J^* + \mathcal{O}(\boldsymbol{\epsilon}^2)$ .

### 4 Finite surface relaxation in the absence of surface shear

In the absence of surface shear, the surface deformation gradient is diagonal

$$\mathbf{F}_s = \begin{pmatrix} F_{s\parallel} & 0 \\ 0 & F_{s\perp} \end{pmatrix}, \quad (\text{S.13})$$

with  $F_{si} = 1 + \epsilon_{si}$ , where  $i = \parallel$  or  $i = \perp$  denote the two principal directions. Assuming the principal directions of the surface relaxation and of the imposed deformation coincide, we obtain the generic expression for the Cauchy principal stresses

$$\begin{aligned} \bar{\sigma}_{si} = & \gamma + \bar{\sigma}_{si}^* + 2\mu_s \left( (F_{si}^*)^4 + 2(F_{si}^*)^2 E_{si}^* \right) \epsilon_{si}^0 \\ & + \lambda_s \left( (F_{si}^*)^4 + 2(F_{si}^*)^2 (E_{si}^* + E_{sj}^*) \right) \epsilon_{si}^0 \\ & + \lambda_s (F_{si}^* F_{sj}^*)^2 \epsilon_{sj}^0, \end{aligned} \quad (\text{S.14})$$

with  $(i, j) = (\parallel, \perp)$  or  $(i, j) = (\perp, \parallel)$  the principal directions,  $\bar{\sigma}_{si}^* = (2\mu_s + \lambda_s)(F_{si}^*)^2 E_{si}^* + \lambda_s (F_{si}^*)^2 E_{sj}^*$  the surface relaxation stress contribution and  $E_{si} = \epsilon_{si}(2 + \epsilon_{si})/2$  the diagonal components of the Green-Lagrange strain tensor.

### 5 Relaxing cylinder

The total energy of the relaxing cylinder,

$$W_{\text{tot}} = \min_{\lambda^*} (S_0 \gamma + V_0 W^R(\lambda^*)), \quad (\text{S.15})$$

comprises a surface contribution  $S_0 \gamma$  and a bulk contribution  $V_0 W^R(\lambda^*)$ , where  $S_0$  and  $V_0$  are the surface and volume of the relaxed cylinder, respectively. Here,  $W^R(\lambda^*) = \mu(2\lambda^{*2} + \lambda^{*-4} - 3)/2$  derives from the strain energy density of a Neo-Hookean incompressible material. The solutions to Eq. (S.15) are

$$\lambda_{\pm}^{*3} = \frac{\gamma/R \pm \sqrt{(\gamma/R)^2 + 4\mu^2}}{4\mu}, \quad (\text{S.16})$$

from which we discard  $\lambda_-^*$  for physical reasons ( $\lambda^* > 0$  when  $L_{ec}/R \ll 1$ ), which leads to Eq. (19).

### Notes and references

- 1 S. Krichen, L. Liu and P. Sharma, *JMPS*, 2019, **127**, 332–357.
